# Supplementary material for: High variation in immune responses and parasite phenotypes in naturally acquired Trypanosoma cruzi infection in a captive non-human primate breeding colony in Texas, USA
Source: PubMed Central journal article supplement (PMC8041201; doi:10.1371/journal.pntd.0009141), 2021-03-31
Supplement: pntd.0009141.s001.pdf [file pntd.0009141.s001.pdf]

# S1 Fig.

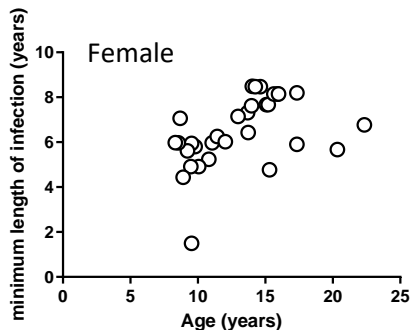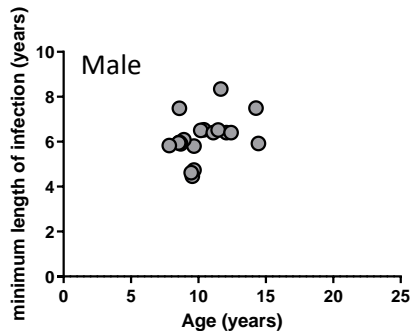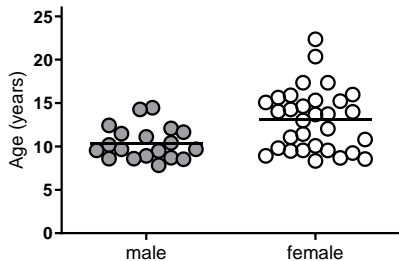

**S1 Fig. Macaques in the study had been infected at least for an average duration of 6.5 years.**

Male (n=19) and female (n=31) macaques in the study had similar ages and displayed comparable minimum length of infection ranging from 1.5 to 8.5 years.
