# Supplementary material for: High variation in immune responses and parasite phenotypes in naturally acquired Trypanosoma cruzi infection in a captive non-human primate breeding colony in Texas, USA
Source: PubMed Central journal article supplement (PMC8041201; doi:10.1371/journal.pntd.0009141), 2021-03-31
Supplement: pntd.0009141.s002.pdf [file pntd.0009141.s002.pdf]

## S2 Fig.

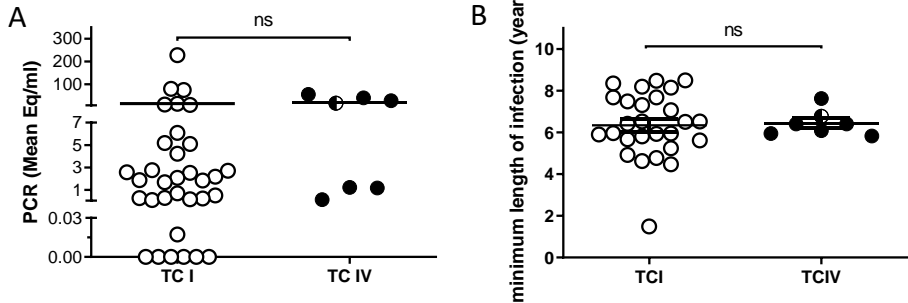

**S2 Fig. Parasite levels in blood and minimum length of infection were similar in macaques infected with either TcI or TcIV.** Parasite load in blood detected by qPCR (A) and minimum length of infection (B) in macaques infected with *T. cruzi* isolates belonging to lineages TcI (n=33 in A; n=27 in B) and TcIV (n=7). ns: non-significant by Mann Whitney test.
