# Supplementary material for: High variation in immune responses and parasite phenotypes in naturally acquired Trypanosoma cruzi infection in a captive non-human primate breeding colony in Texas, USA
Source: PubMed Central journal article supplement (PMC8041201; doi:10.1371/journal.pntd.0009141), 2021-03-31
Supplement: pntd.0009141.s003.pdf [file pntd.0009141.s003.pdf]

# S3 Fig.

## A

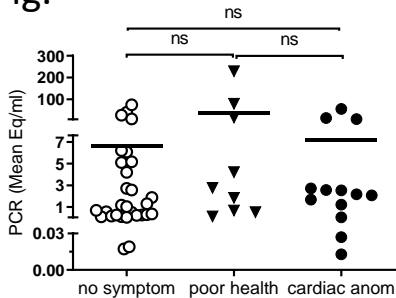

## B

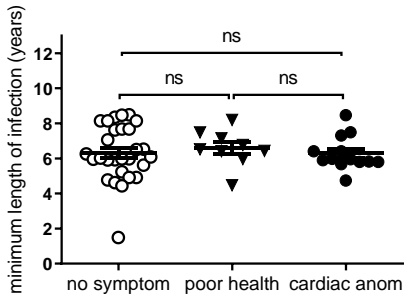

**S3 Fig. Health condition of seropositive macaques does not correlate with parasite load or minimum length of infection.** Parasite level in blood determined by qPCR (A) and minimum length of infection (B) in animals displaying no symptoms (no symptom; n=28), poor general health condition (poor health; n=9) or cardiac anomalies (cardiac anom; n=13). ns: non-significant by Mann Whitney test.
